# Supplementary material
Source: PubMed Central journal article supplement (PMC7832826)
Supplement: mmc1.pdf [file mmc1.pdf]

# THE LANCET

## Child & Adolescent Health

### Supplementary appendix

This appendix formed part of the original submission. We post it as supplied by the authors.

Supplement to: Tiwari L, Shekhar S, Bansal A, et al. COVID-19 associated arterial ischaemic stroke and multisystem inflammatory syndrome in children: a case report. *Lancet Child Adolesc Health* 2020; published online October 27. [http://dx.doi.org/10.1016/S2352-4642\(20\)30314-X](http://dx.doi.org/10.1016/S2352-4642(20)30314-X)

Table 2. Clinical status of the index child during the course of PICU stay

| Clinical Scores                         | Day 1          | Day 3         | Day 6 | Day 9          | Day 12         | Day 15         | Day 35         |
|-----------------------------------------|----------------|---------------|-------|----------------|----------------|----------------|----------------|
| SOFA Score/<br>Risk of mortality<br>(%) | 2/ $\leq 33.3$ | 12/ $\geq 95$ | 10/50 | 8/ $\leq 33.3$ | 3/ $\leq 33.3$ | 3/ $\leq 33.3$ | 1/ $\leq 33.3$ |
| Modified Shock<br>Index (MSI)           | 0.97           | 2.80          | 2.2   | 2.0            | 1.86           | 1.66           | 1.1            |
| Vasoactive<br>Inotrope Score<br>(VIS)   | -              | 30            | 20    | 10             | -              | -              | -              |
| Oxygenation<br>Index (OI)               | -              | 4.2           | 1.6   | 1.36           | 1.28           | -              | -              |

Abbreviations: SOFA, sequential organ failure assessment

Modified shock index (MSI) is defined as heart rate divided by mean blood pressure

Oxygenation index is calculated as mean airway pressure MAP (in cmH<sub>2</sub>O)  $\times$  FiO<sub>2</sub>  $\times$  100  $\div$  PaO<sub>2</sub>.
